# Supplementary material for: Reversible crystal-to-crystal transformation of a 3D–3D coordination polymer by solid state anion-replacement with no change in nano-particle morphology
Source: Royal Society of Chemistry journal article supplement (doi:10.1039/c1ce05311f), 2011-01-01
Supplement: c1ce05311f.pdf [file c1ce05311f.pdf]

## **Electronic Supplementary Information for MS:**

# **Reversible Crystal-to-Crystal Transformation of a 3D-3D Coordination Polymer by Solid State Anion-replacement with No Change in Nano-particles Morphology**

**Vahid Safarifard, Ali Morsali\***

Department of Chemistry, Faculty of Sciences, Tarbiat Modares University, P.O. Box  
14115-175, Tehran, Islamic Republic of Iran

### Experimental Section:

Crystallographic measurements were made at 298K for compounds **1** using a Bruker APEX area-detector diffractometer. The intensity data were collected using graphite monochromated Mo- $K_{\alpha}$  radiation. The structures were solved by direct methods and refined by full-matrix least-squares techniques on  $F^2$ . Structure solution and refinement was accomplished using SIR97, SHELXL97 and WinGX. Crystal data for **1**: orthorhombic space group  $Pna2_1$ ,  $a = 8.4799(14) \text{ \AA}$ ,  $b = 15.706(3) \text{ \AA}$ ,  $c = 5.7500(10) \text{ \AA}$ ,  $\alpha = 90$ ,  $\beta = 90$ ,  $\gamma = 90^\circ$ ,  $V = 765.8(2) \text{ \AA}^3$ ,  $Z = 4$ ,  $T = 298(2) \text{ K}$ . The refinement of 106 parameters on the basis of 1439 independent reflections (of a total of 3929) converged at  $R1 = 0.0237$ ,  $wR2 = 0.0528$ .

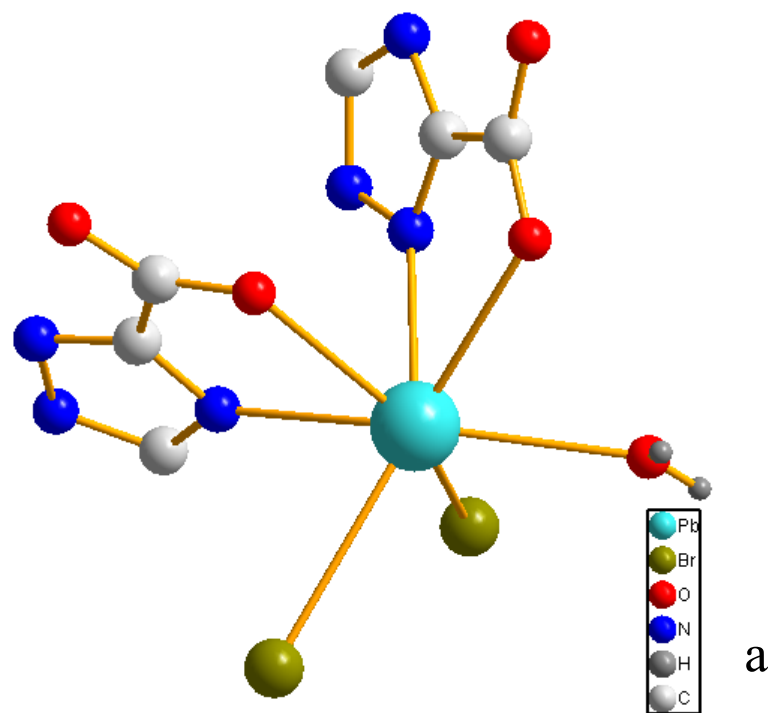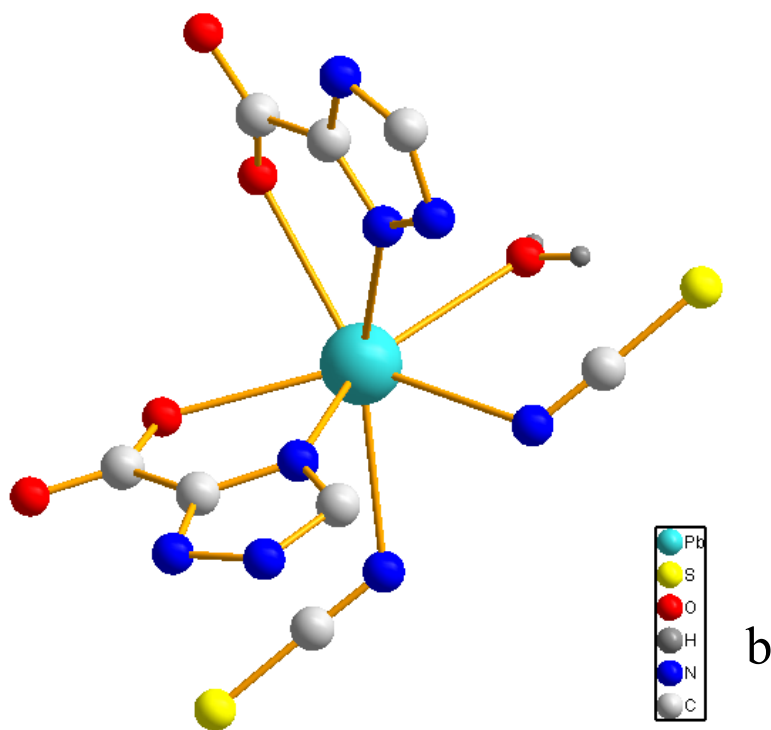

**Fig. S1.** The coordination environments of the (a) compound  $[\text{Pb}(\text{L})(\mu_2\text{-Br})(\text{H}_2\text{O})]_n$  (**1**) and (b) compound  $[\text{Pb}(\text{L})(\mu_{1,1}\text{-NCS})(\text{H}_2\text{O})]_n$  (**2**).

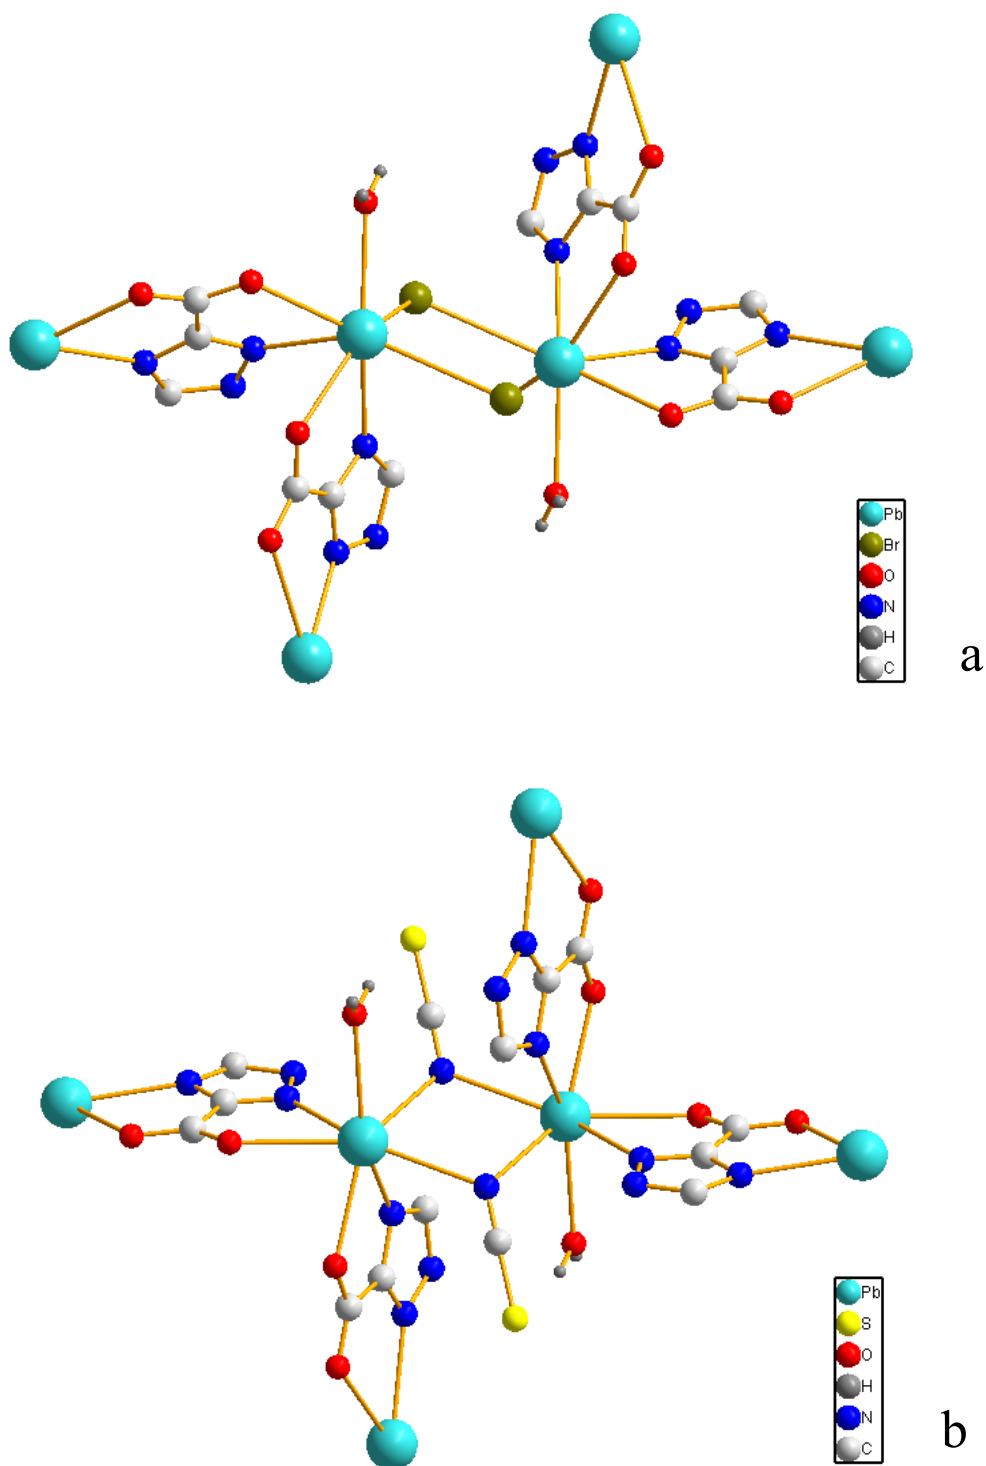

**Fig. S2.** (a) View of a section of the dimeric units by bridging of the Br<sup>-</sup> anions via one sides in **1** and (b) View of a section of the dimeric units by bridging of the NCS<sup>-</sup> anions via one sides in **2**.

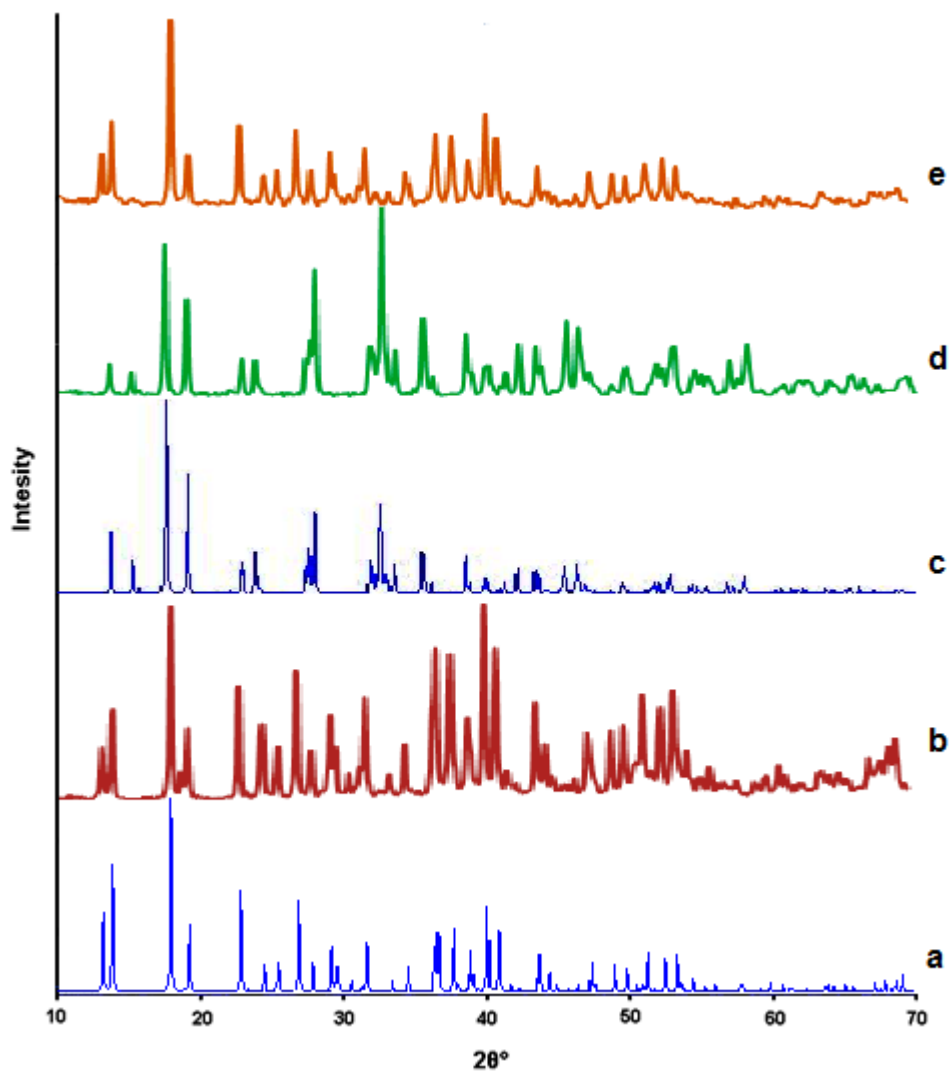

**Fig. S3.** The XRD patterns of (a) simulated from single crystal X-ray data of compound **1**, (b) bulk materials as synthesized of compound **1**, (c) simulated from single crystal X-ray data of compound **2**, (d) bulk materials obtained by solid state anion-replacement of compound **1**, (e) the reversed species obtained by solid state anion-replacement of compound **2**.

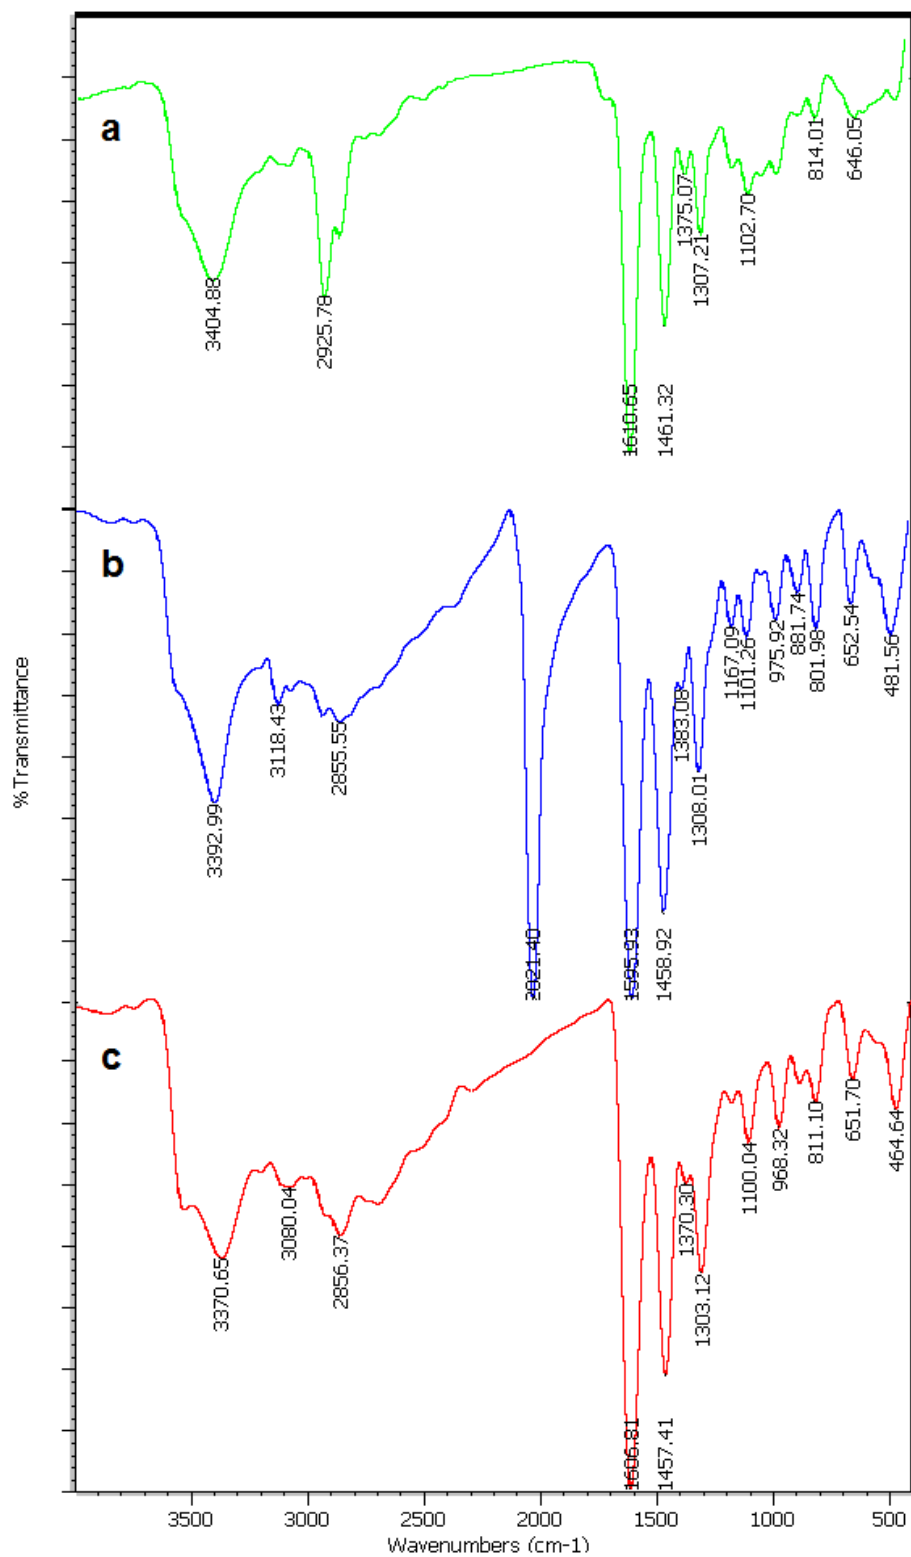

**Fig. S4.** IR spectra of (a) compound **1**, (b) bulk materials obtained by solid state anion-replacement of compound **1** and (c) the reversed species obtained by solid state anion-replacement of compound **2**.

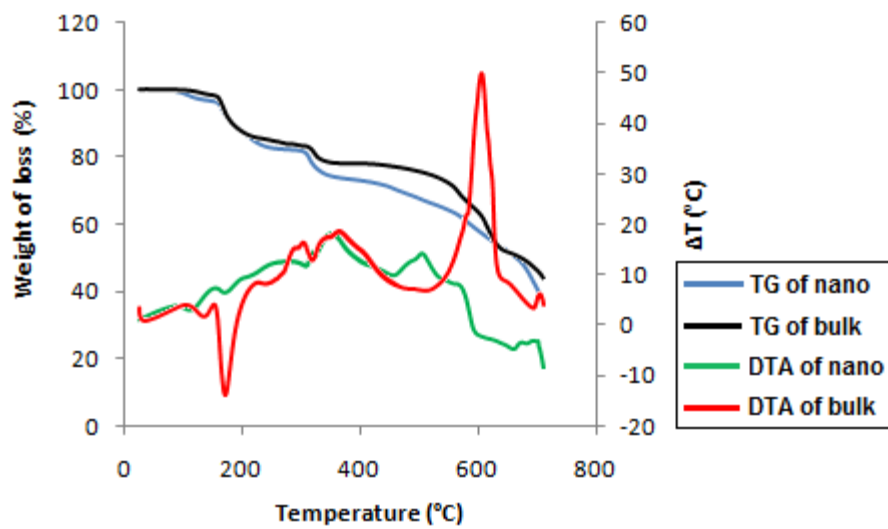

Fig. S5. Thermal behaviour of compound 1 as bulk and nanoparticles.

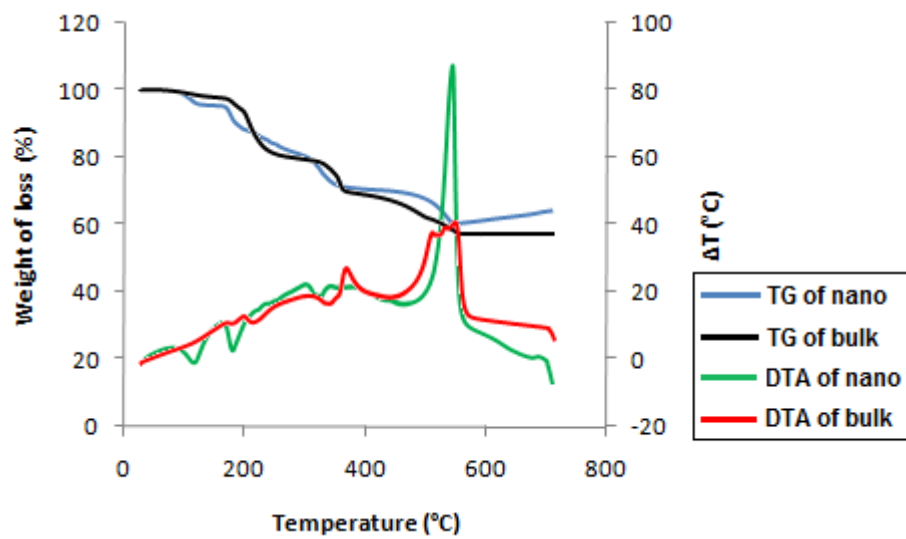

Fig. S6. Thermal behaviour of compound **2** as bulk and nano-particle.



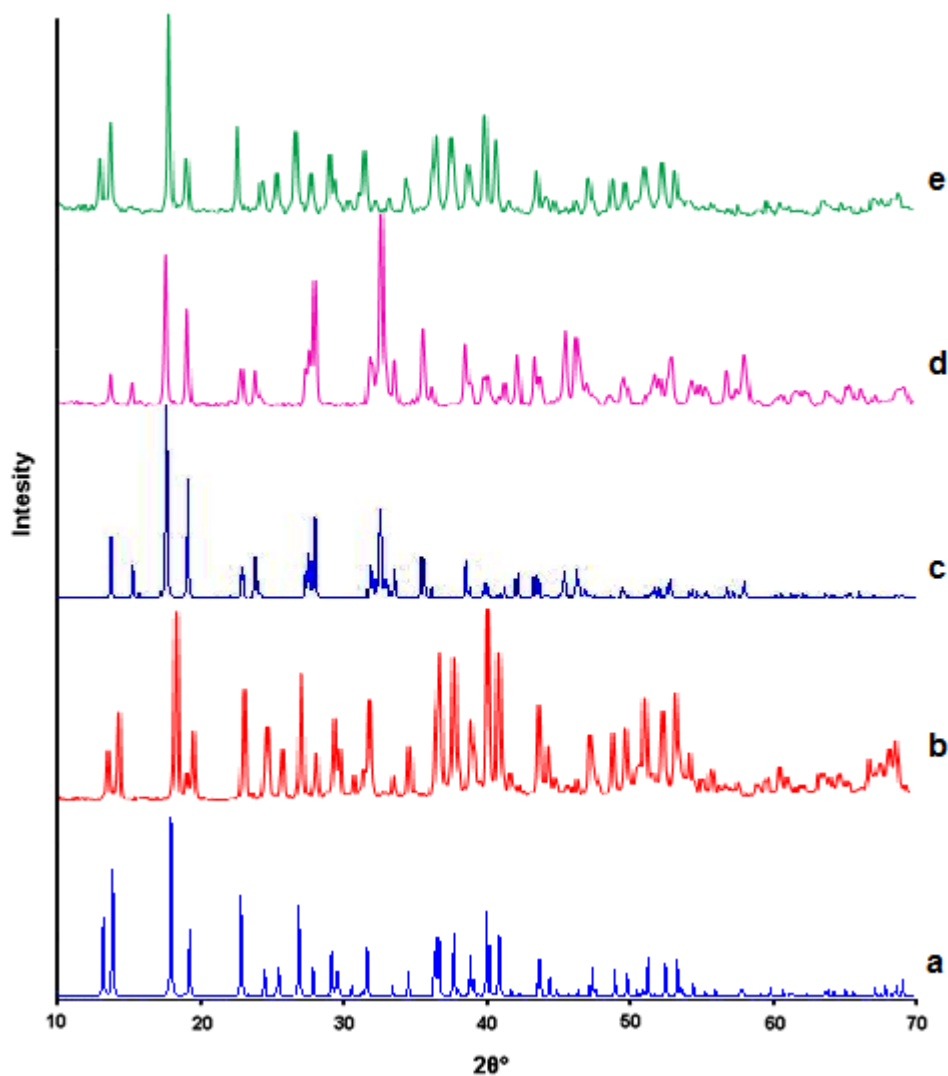

**Fig. S7.** The XRD patterns of (a) simulated from single crystal X-ray data of compound **1**, (b) nanoparticles of compound **1** prepared by sonochemical process, (c) simulated from single crystal X-ray data of compound **2**, (d) nanoparticles obtained by solid state anion-replacement of compound **1**, (e) the reversed species obtained by solid state anion-replacement of compound **2**.

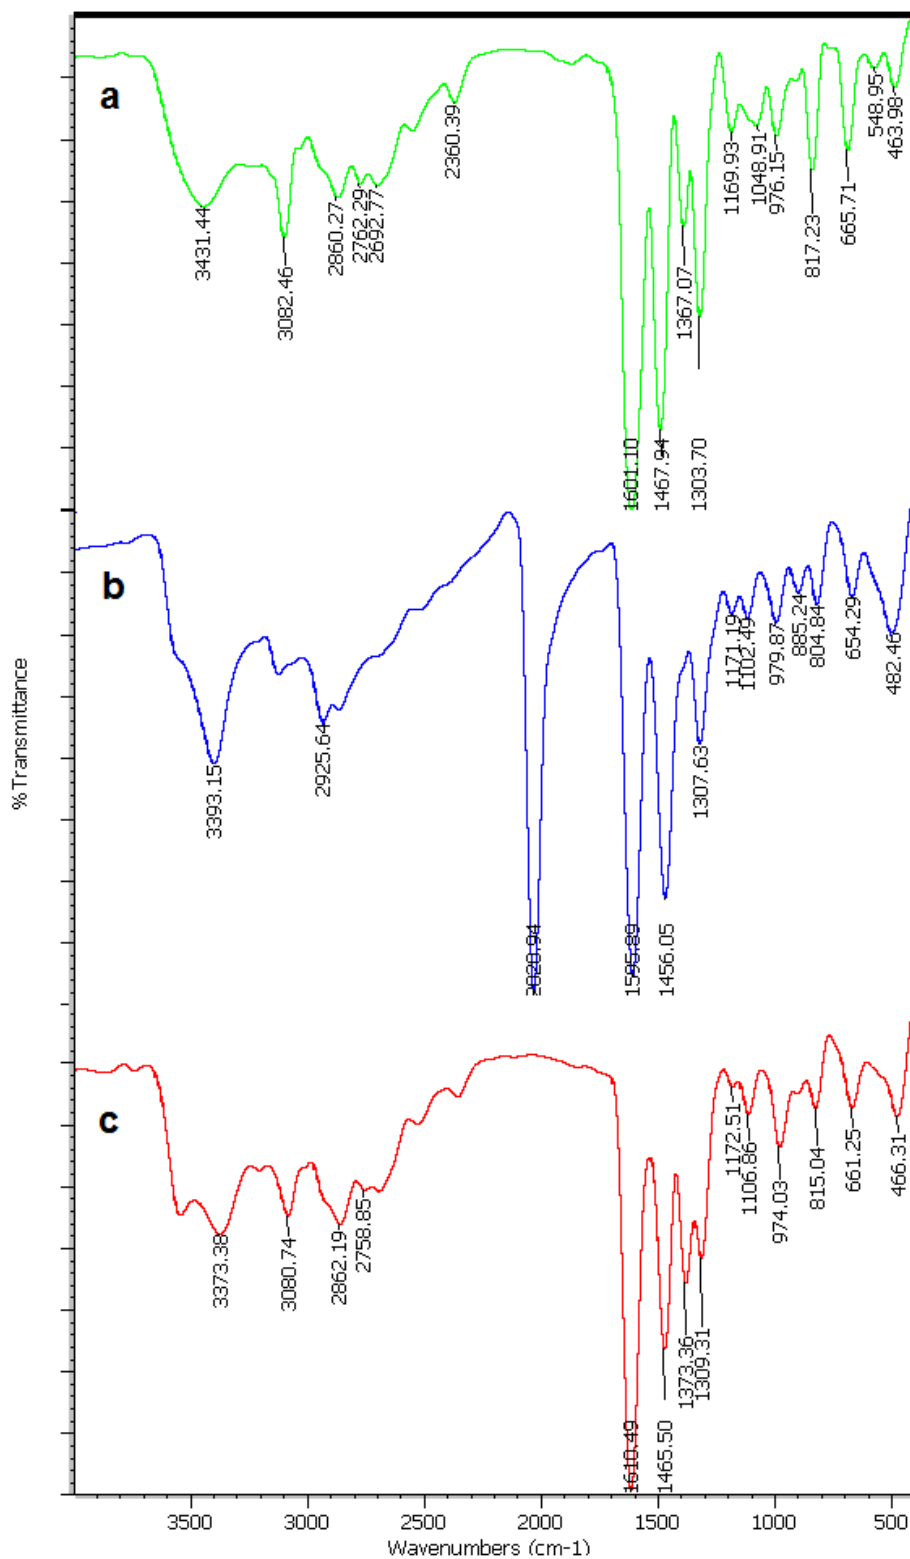

**Fig. S8.** IR spectra of (a) nano-particles of compound **1** produced by sonochemical method, (b) nano-particles of compound **2** obtained by solid state anion-replacement of compound **1** and (c) the reversed nano-particles obtained by solid state anion-replacement of compound **2**.

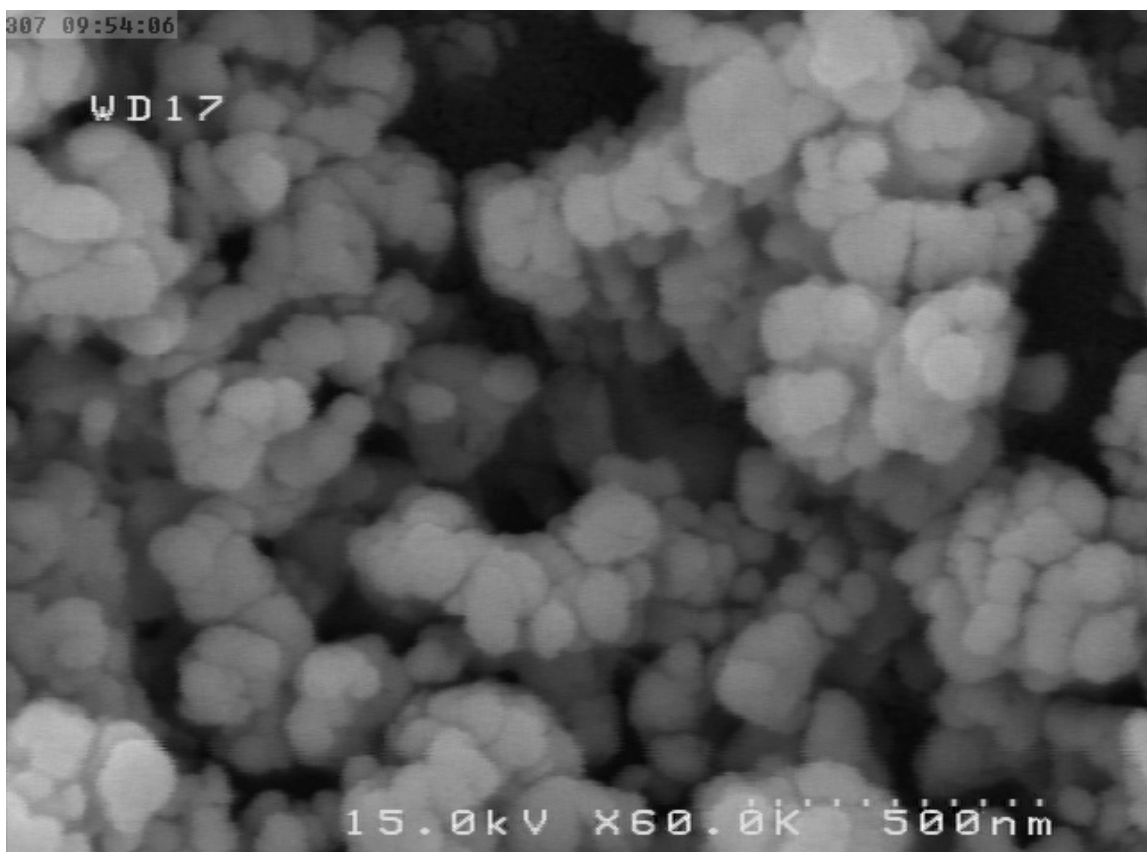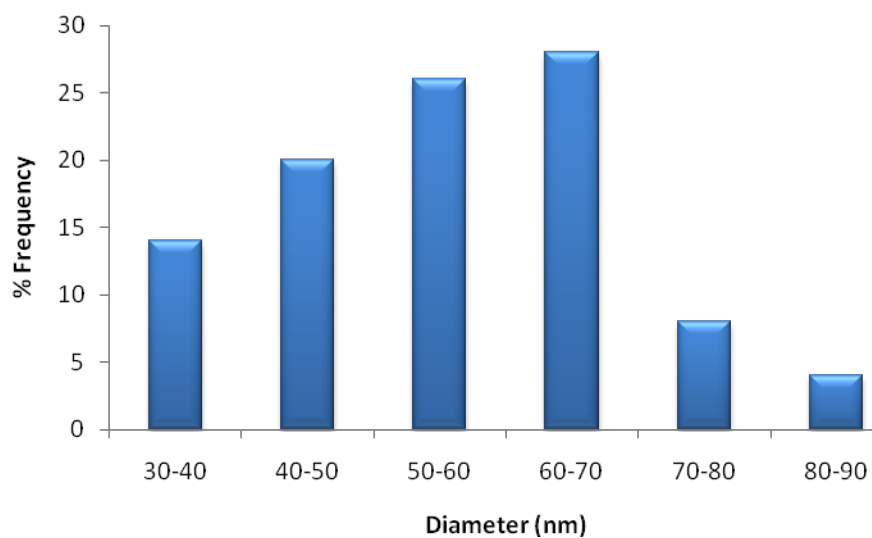

**Fig. S9.** The SEM image and the corresponding particle size distribution histogram of the reversed species obtained by solid state anion-replacement of compound **2**.

**Table S1.** Crystal data and structure refinement of [Pb(L)( $\mu_2$ -Br)(H<sub>2</sub>O)]<sub>n</sub> (**1**) and [Pb(L)( $\mu_{1,1}$ -NCS)(H<sub>2</sub>O)]<sub>n</sub> (**2**).

| Identification code               | Compound 1                                                                                                                  | Compound 2                                                                                                                                 |
|-----------------------------------|-----------------------------------------------------------------------------------------------------------------------------|--------------------------------------------------------------------------------------------------------------------------------------------|
| Empirical formula                 | C <sub>3</sub> H <sub>4</sub> Br N <sub>3</sub> O <sub>3</sub> Pb                                                           | C <sub>4</sub> H <sub>4</sub> N <sub>4</sub> O <sub>3</sub> PbS                                                                            |
| Formula weight                    | 417.19                                                                                                                      | 394.35                                                                                                                                     |
| Temperature                       | 298(2) K                                                                                                                    | 296(2) K                                                                                                                                   |
| Wavelength                        | 0.71073 Å                                                                                                                   | 0.71073 Å                                                                                                                                  |
| Crystal system                    | orthorhombic                                                                                                                | monoclinic                                                                                                                                 |
| Space group                       | Pna2 <sub>1</sub>                                                                                                           | P 2 <sub>1</sub> /c                                                                                                                        |
| Unit cell dimensions              | a = 8.4799(14) Å<br>b = 15.706(3) Å<br>c = 5.7500(10) Å<br>$\alpha = 90^\circ$<br>$\beta = 90^\circ$<br>$\gamma = 90^\circ$ | a = 6.9672(9) Å<br>b = 13.4568(16) Å<br>c = 9.6163(12) Å<br>$\alpha = 90.00^\circ$<br>$\beta = 110.715(2)^\circ$<br>$\gamma = 90.00^\circ$ |
| Volume                            | 765.8(2) Å <sup>3</sup>                                                                                                     | 843.302 Å <sup>3</sup>                                                                                                                     |
| Z                                 | 4                                                                                                                           | 4                                                                                                                                          |
| Density (calculated)              | 3.618 Mg/m <sup>3</sup>                                                                                                     | 3.106 g.cm <sup>-3</sup>                                                                                                                   |
| Absorption coefficient            | 27.209 mm <sup>-1</sup>                                                                                                     | 20.233 mm <sup>-1</sup>                                                                                                                    |
| F(000)                            | 736                                                                                                                         | 708                                                                                                                                        |
| Crystal size                      | 0.35 × 0.21 × 0.18 mm <sup>3</sup>                                                                                          | 0.28 × 0.24 × 0.22 mm <sup>3</sup>                                                                                                         |
| Theta range for data collection   | 2.59 to 25.74°                                                                                                              | 2.72 to 30.33°                                                                                                                             |
| Index ranges                      | -10 ≤ h ≤ 8<br>-17 ≤ k ≤ 19<br>-7 ≤ l ≤ 6                                                                                   | -8 ≤ h ≤ 8<br>-16 ≤ k ≤ 10<br>-10 ≤ l ≤ 11                                                                                                 |
| Reflections collected             | 3929                                                                                                                        | 4158                                                                                                                                       |
| Independent reflections           | 1439 [R(int) = 0.0307]                                                                                                      | 1486 [R(int) = 0.0354]                                                                                                                     |
| Absorption correction             | Semi-empirical from equivalents                                                                                             | Integration                                                                                                                                |
| Refinement method                 | Full-matrix least-squares on F <sup>2</sup>                                                                                 | Full-matrix least-squares on F <sup>2</sup>                                                                                                |
| Data / restraints / parameters    | 1439 / 4 / 106                                                                                                              | 1486 / 0 / 119                                                                                                                             |
| Goodness-of-fit on F <sup>2</sup> | 1.021                                                                                                                       | 1.101                                                                                                                                      |
| Final R. [I > 2σ(I)]              | R <sub>1</sub> = 0.0237, wR <sub>2</sub> = 0.0528                                                                           | R <sub>1</sub> = 0.0244, wR <sub>2</sub> = 0.0618                                                                                          |
| R indices (all data)              | R <sub>1</sub> = 0.0260, wR <sub>2</sub> = 0.0534                                                                           | R <sub>1</sub> = 0.0256, wR <sub>2</sub> = 0.0624                                                                                          |
| Largest diff. Peak, hole          | 1.343 and -1.659 e.Å <sup>-3</sup>                                                                                          | 1.563 and -2.173 e.Å <sup>-3</sup>                                                                                                         |

**Table S2.** Bond lengths /Å and angles /° for [Pb(L)(μ<sub>2</sub>-Br)(H<sub>2</sub>O)]<sub>n</sub>

---

|                      |            |
|----------------------|------------|
| Pb(1)-N(1)           | 2.591(6)   |
| Pb(1)-N(3)#1         | 2.607(7)   |
| Pb(1)-O(1)           | 2.675(6)   |
| Pb(1)-O(3)           | 2.707(6)   |
| Pb(1)-O(2)#1         | 2.745(6)   |
| Pb(1)-Br(1)          | 2.9363(11) |
| Pb(1)-Br(1)#2        | 3.2340(10) |
| Br(1)-Pb(1)#3        | 3.2340(10) |
| O(2)-Pb(1)#4         | 2.745(6)   |
| N(3)-Pb(1)#4         | 2.607(7)   |
| N(1)-Pb(1)-N(3)#1    | 71.2(2)    |
| N(1)-Pb(1)-O(1)      | 63.85(19)  |
| N(3)#1-Pb(1)-O(1)    | 73.4(2)    |
| N(1)-Pb(1)-O(3)      | 151.3(3)   |
| N(3)#1-Pb(1)-O(3)    | 97.7(3)    |
| O(1)-Pb(1)-O(3)      | 139.8(2)   |
| N(1)-Pb(1)-O(2)#1    | 123.38(17) |
| N(3)#1-Pb(1)-O(2)#1  | 62.2(2)    |
| O(1)-Pb(1)-O(2)#1    | 73.18(18)  |
| O(3)-Pb(1)-O(2)#1    | 68.2(2)    |
| N(1)-Pb(1)-Br(1)     | 77.86(16)  |
| N(3)#1-Pb(1)-Br(1)   | 83.94(16)  |
| O(1)-Pb(1)-Br(1)     | 139.94(13) |
| O(3)-Pb(1)-Br(1)     | 74.7(2)    |
| O(2)#1-Pb(1)-Br(1)   | 124.16(13) |
| N(1)-Pb(1)-Br(1)#2   | 70.18(15)  |
| N(3)#1-Pb(1)-Br(1)#2 | 140.58(15) |
| O(1)-Pb(1)-Br(1)#2   | 96.30(15)  |
| O(3)-Pb(1)-Br(1)#2   | 112.6(2)   |
| O(2)#1-Pb(1)-Br(1)#2 | 152.19(13) |
| Br(1)-Pb(1)-Br(1)#2  | 80.57(2)   |
| Pb(1)-Br(1)-Pb(1)#3  | 107.58(3)  |
| C(3)-O(1)-Pb(1)      | 120.4(5)   |
| C(3)-O(2)-Pb(1)#4    | 118.6(5)   |
| Pb(1)-O(3)-H(3A)     | 141(5)     |
| Pb(1)-O(3)-H(3B)     | 99(5)      |
| C(2)-N(1)-Pb(1)      | 140.4(5)   |
| C(1)-N(1)-Pb(1)      | 116.0(5)   |
| C(1)-N(3)-Pb(1)#4    | 116.8(6)   |
| N(2)-N(3)-Pb(1)#4    | 135.6(5)   |

---

Symmetry transformations used to generate equivalent atoms: #1  $x+1/2, -y+1/2, z$ ; #2  $-x+1, -y, z+1/2$ ; #3  $-x+1, -y, z-1/2$ ; #4  $x-1/2, -y+1/2, z$ .

---

**Table S3.** Bond lengths /Å and angles /° for [Pb(L)( $\mu_{1,1}$ -NCS)(H<sub>2</sub>O)]<sub>n</sub>.(2).

---

|                     |            |
|---------------------|------------|
| Pb(1)–N(1)          | 2.525(4)   |
| Pb(1)–O(1)          | 2.621(4)   |
| Pb(1)–N(2)#1        | 2.677(5)   |
| Pb(1)–N(4)          | 2.699(5)   |
| Pb(1)–N(4)#2        | 2.725(5)   |
| Pb(1)–O(2)#1        | 2.746(4)   |
| N(1)–Pb(1)–O(1)     | 64.69(12)  |
| N(1)–Pb(1)–N(2)#1   | 75.22(15)  |
| O(1)–Pb(1)–N(2)#1   | 105.97(15) |
| N(1)–Pb(1)–N(4)     | 72.49(14)  |
| O(1)–Pb(1)–N(4)     | 135.20(13) |
| N(2)#1–Pb(1)–N(4)   | 73.89(13)  |
| N(1)–Pb(1)–N(4)#2   | 74.23(15)  |
| O(1)–Pb(1)–N(4)#2   | 81.36(13)  |
| N(2)#1–Pb(1)–N(4)#2 | 141.42(14) |
| N(4)–Pb(1)–N(4)#2   | 74.87(16)  |
| N(1)–Pb(1)–O(2)#1   | 109.27(13) |
| O(1)–Pb(1)–O(2)#1   | 76.27(12)  |
| N(2)#1–Pb(1)–O(2)#1 | 61.79(12)  |
| N(4)–Pb(1)–O(2)#1   | 132.52(13) |
| N(4)#2–Pb(1)–O(2)#1 | 152.57(13) |

---

Symmetry transformations used to generate equivalent atoms: for #1 x, -y+1/2, z-1/2; #2 -x+2, -y, -z+1.
